# Supplementary material for: pH-induced solvothermal synthesis and characterization of two novel thioarsenate compounds: Three-dimensional (1,2-pdaH2)0.5As5S8 containing ψ-As(iii)S4 and two-dimensional (NH4)2As8S13
Source: Royal Society of Chemistry journal article supplement (doi:10.1039/c2ce25475a), 2012-01-01
Supplement: c2ce25475a.pdf [file c2ce25475a.pdf]

# pH-induced solvothermal synthesis and characterization of two novel thioarsenate compounds: three-dimensional $(1,2\text{-pdaH}_2)_{0.5}\text{As}_5\text{S}_8$ containing $\psi\text{-As(III)S}_4$ and two-dimensional $(\text{NH}_4)_2\text{As}_8\text{S}_{13}$

Ke-Zhao Du<sup>a,b</sup>, Mei-Ling Feng<sup>a</sup>, Jian-Rong Li<sup>a</sup> and Xiao-Ying Huang<sup>a,\*</sup>

<sup>a</sup> State Key Laboratory of Structural Chemistry, Fujian Institute of Research on the Structure of Matter, the Chinese Academy of Sciences, Fuzhou, Fujian 350002, P.R.

<sup>b</sup> Graduate University of the Chinese Academy of Sciences, Beijing 100049, P. R. China

Fax: +86 591 83793727; Tel: +86 591 83793727; E-mail: [xyhuang@fjirsm.ac.cn](mailto:xyhuang@fjirsm.ac.cn)

## 1. Synthesis

The optimal reaction for **1** is described as follows. A mixture of  $\text{As}_4\text{S}_4$  powder (0.107g, 0.25 mmol), S powder (0.096 g, 3 mmol),  $\text{NH}_4\text{Cl}$  powder (0.080 g, 1.5 mmol), 0.2 mL 1,2-pda and 6 mL  $\text{CH}_3\text{OH}$  was sealed in a stainless steel reactor with a 28 mL Teflon liner and kept at 150 °C for 6 days, and then cooled to room temperature. Brown octahedral crystals of **1** along with yellow powder were obtained by filtration and washed with ethanol and air-dried. The crystals were selected by hand (stable in the air) in 37% yield (0.245 g) based on  $\text{As}_4\text{S}_4$ . Anal. Calcd. for **1**: C 2.69%, H 0.90%, N 2.09%; found: C 2.68%, H 0.62%, N 2.16%.

The optimal reaction for synthesizing **2** was similar to that for **1**. The only difference is that the  $\text{NH}_4\text{Cl}$  for **1** was replaced by the  $(\text{NH}_4)_2\text{C}_2\text{O}_4$  for **2**. Black sheet-like crystals of **2** along with yellow powder were obtained by filtration and washed with ethanol and air-dried. The crystals were selected by hand (stable in the air) in 21% yield (0.224 g) based on  $\text{As}_4\text{S}_4$ . Anal. Calcd. for **2**: C 0, H 0.77%, N 2.66%; found: C <0.3%, H 0.77%, N 2.66%.

## 2. More structural details

The intensity data were collected on a Rigaku Saturn 724 CCD diffractometer with graphite-monochromated  $\text{MoK}\alpha$  radiation ( $\lambda = 0.71073 \text{ \AA}$ ) at 123 K. An empirical absorption correction was applied using the multiscan method. The structure was solved by direct methods and refined by full-matrix least-squares cycles in SHELX-97.<sup>1</sup> The 1,2-pdaH<sub>2</sub> cation in **1** is highly disordered over symmetrically related positions therefore the site occupancies of the N, C, and H

atoms were set to be 0.25, corresponding to quarter of a 1,2-pdaH<sub>2</sub> cation per asymmetry unit. The empirical formulae for **1** and **2** were confirmed by thermogravimetric analyses and elemental analyses. Selected hydrogen-bonding data of **1** and **2** are listed in Tables S1 and S2, respectively..

**Table S1.** Selected hydrogen bond data for compound **1**.

| D-H...A              | <i>d</i> (D-H) (Å) | <i>d</i> (H...A) (Å) | <i>d</i> (D...A) (Å) | D-H...A (°) |
|----------------------|--------------------|----------------------|----------------------|-------------|
| N(1)-H(1A)...S(4)    | 0.90               | 2.44                 | 3.19(3)              | 141.2       |
| N(1)-H(1A)...S(2)#3  | 0.90               | 2.86                 | 3.57(2)              | 136.5       |
| N(1)-H(1B)...S(1)#3  | 0.90               | 2.38                 | 3.11(2)              | 138.2       |
| N(2)-H(2A)...S(1)#10 | 0.90               | 2.49                 | 3.341(9)             | 158.2       |
| N(2)-H(2B)...S(4)#8  | 0.90               | 2.71                 | 3.320(2)             | 126.5       |
| N(2)-H(2C)...S(4)#7  | 0.90               | 2.57                 | 3.320(2)             | 140.7       |

Symmetry transformations used to generate equivalent atoms: #1  $x+1/4, y+1/4, -z+1$ ; #2  $-x+1/4, -y+5/4, z$ ; #3  $x-1/4, -y+1, z-1/4$ ; #4  $-x+1/2, y+1/4, z-1/4$ ; #5  $x+1/4, -y+1, z+1/4$ ; #6  $x-1/4, y-1/4, -z+1$ ; #7  $-x+3/4, -y+3/4, z$ ; #8  $-x+3/4, y, -z+3/4$ ; #9  $x, -y+3/4, -z+3/4$ ; #10  $-x+1, y-1/4, z-1/4$ .

**Table S2.** Selected hydrogen bond data for compound **2**.

| D-H...A             | <i>d</i> (D-H) (Å) | <i>d</i> (H...A) (Å) | <i>d</i> (D...A) (Å) | D-H...A (°) |
|---------------------|--------------------|----------------------|----------------------|-------------|
| N(1)-H(1)...S(13)   | 0.89               | 2.46                 | 3.300(7)             | 157.9       |
| N(1)-H(2)...S(2)#5  | 0.89               | 2.79                 | 3.675(7)             | 171.2       |
| N(1)-H(3)...S(9)#6  | 0.89               | 2.96                 | 3.678(6)             | 138.9       |
| N(1)-H(4)...S(6)#5  | 0.89               | 2.86                 | 3.394(6)             | 119.7       |
| N(1)-H(4)...S(11)#7 | 0.89               | 2.93                 | 3.742(6)             | 153.0       |
| N(1)-H(4)...S(4)#5  | 0.89               | 3.01                 | 3.573(7)             | 123.3       |
| N(2)-H(5)...S(6)#4  | 0.89               | 2.64                 | 3.391(7)             | 143.4       |
| N(2)-H(5)...S(7)#6  | 0.89               | 2.93                 | 3.545(8)             | 127.3       |
| N(2)-H(6)...S(8)#8  | 0.89               | 2.96                 | 3.518(7)             | 122.1       |
| N(2)-H(7)...S(8)    | 0.89               | 2.60                 | 3.449(7)             | 160.3       |
| N(2)-H(8)...S(3)    | 0.89               | 2.65                 | 3.534(8)             | 171.9       |

Symmetry transformations used to generate equivalent atoms: #1  $x, -y, z+1/2$ ; #2  $x, y+1, z$ ; #3  $x, y-1, z$ ; #4  $x, -y, z-1/2$ ; #5  $x-1/2, y+1/2, -z+1/2$ ; #6  $-x+1, y, -z+1/2$ ; #7  $-x+1, -y+1, -z$ ; #8  $-x+3/2, y-1/2, z$ .

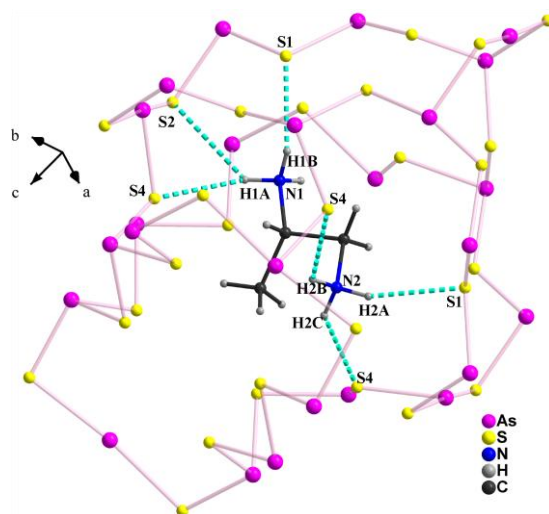

Fig. S1 A fragment of **1** showing the H-bonds between the cation and anionic 3D framework.

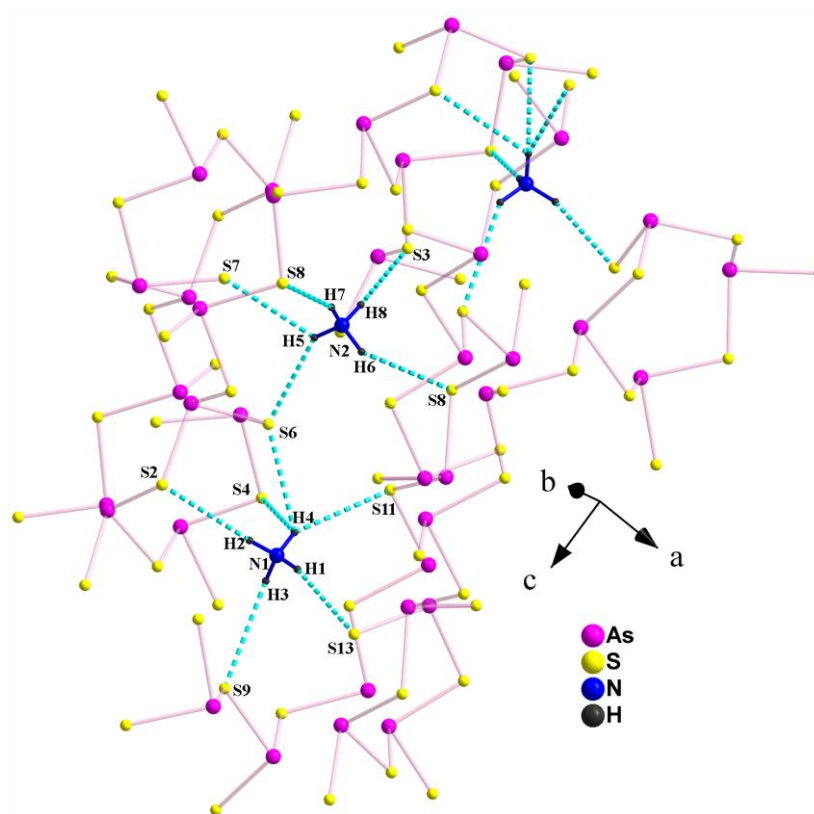

Fig. S2 A fragment of **2** showing the H-bonding between the cations and anionic layers.

### 3. Physical measurements

All chemicals were used as purchased without further purification. Element analyses of C, H and N were performed on a German Elementar Vario EL III instrument. The infrared spectrum was taken on a Magna 750 FTIR spectrometer with sample as KBr pellet in the range of 4000-400  $\text{cm}^{-1}$ . Powder X-ray diffraction (PXRD) patterns were recorded on a Miniflex II diffractometer at 30 kV and 15 mA using  $\text{CuK}\alpha$  (1.54178 Å), with a scan speed of 1°/min at room temperature. The simulated PXRD pattern from single crystal data was produced using the PowderCell program. Simultaneous thermoanalysis (TG–DSC) was carried out with a NETZSCH STA449C unit, at a heating rate of 5 °C/min under a nitrogen atmosphere. Optical diffuse reflectance spectrum was measured at room temperature with a Perkin-Elmer Lambda 900 UV/Vis spectrophotometer by using  $\text{BaSO}_4$  powder as 100% reflectance and the room-temperature optical absorption spectrum of the title compound was obtained from diffuse reflectance experiment.<sup>2</sup>

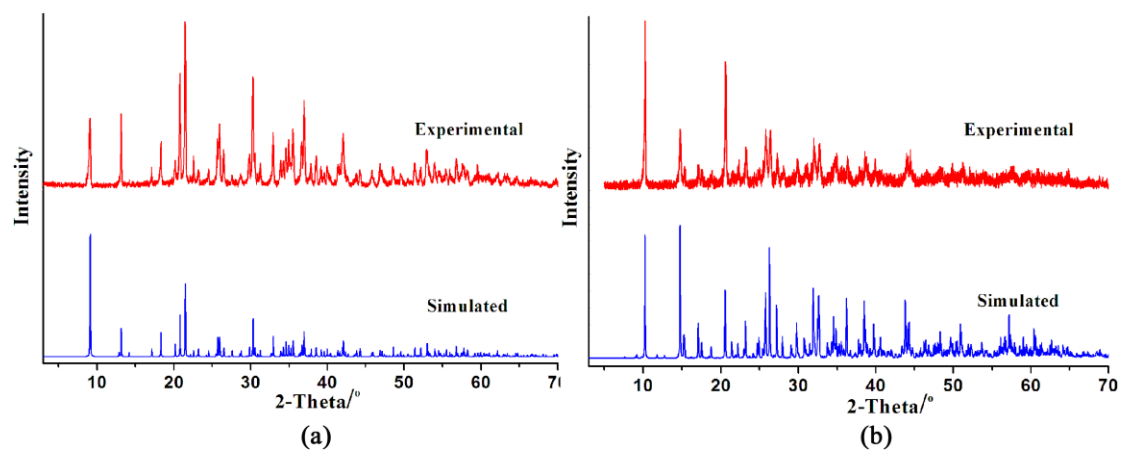

Figure S3 The PXRD patterns (red) are in good agreement with the simulated PXRD patterns (blue) for compounds **1** (a) and **2** (b).

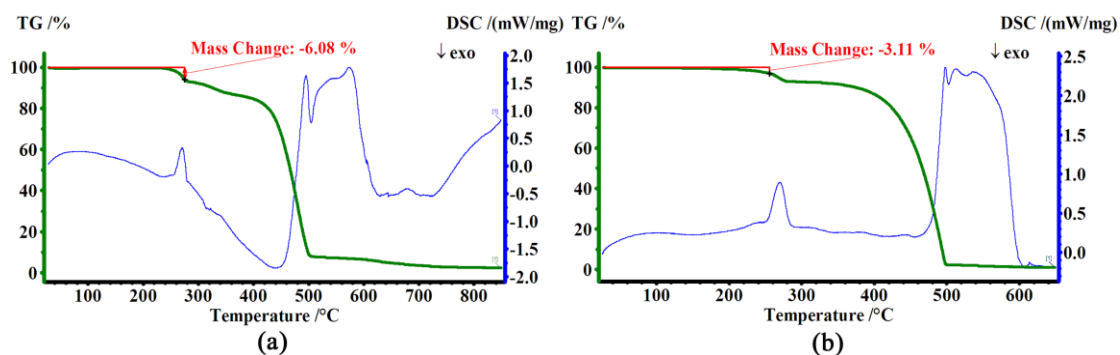

Figure S4 DSC-TG curves for compounds **1** (a) and **2** (b).

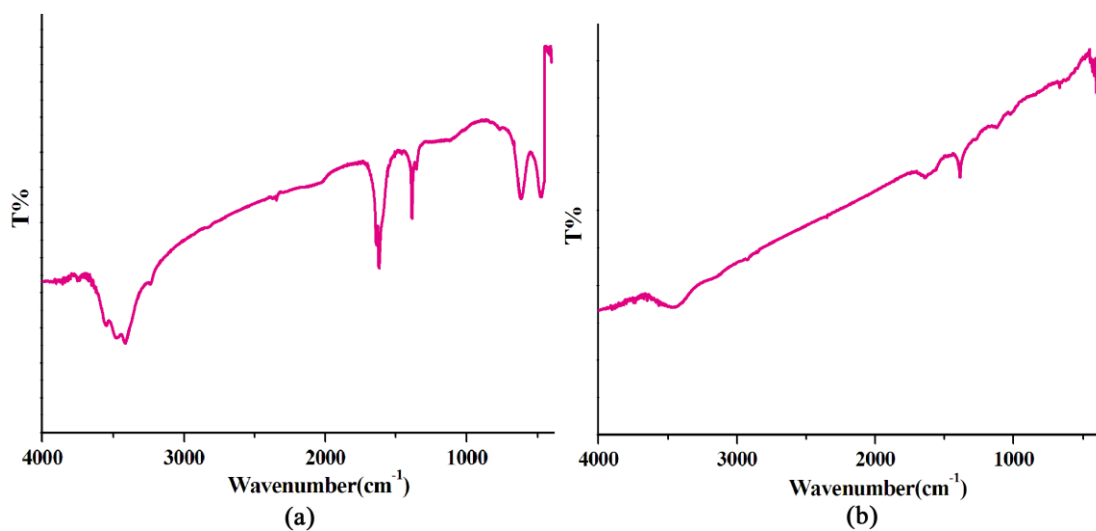

Figure S5 IR spectra of compounds **1** (a) and **2** (b).

## References

1. Sheldrick, G. M., *SHELXS97 and SHELXL97*. University of Göttingen: Germany, 1997.
2. (a) Li, J.; Chen, Z.; Wang, X.-X.; Proserpio, D. M. *J. Alloy. Compd.* 1997, **262**, 28-33; (b) Wendlandt, W. W.; Hecht, H. G., *Reflectance spectroscopy*. Interscience Publishers: New York, 1966.
